# Supplementary material for: Adsorption between TC-stabilized AuNPs and the phosphate group: application of the PTP1B activity assay
Source: Royal Society of Chemistry journal article supplement (doi:10.1039/c5an01906k), 2015-01-01
Supplement: c5an01906k1.pdf [file c5an01906k1.pdf]

## Supporting Information

### Adsorption between TC-stabilized AuNPs and phosphate group: application for PTP1B activity assay

Jun Lv,<sup>a</sup> Xiaonan Wang,<sup>a,b</sup> Yuanyuan Zhang,<sup>c</sup> Defeng Li,<sup>a</sup> Juan Zhang\*<sup>a</sup> and Lizhou Sun\*<sup>c</sup>

<sup>a</sup>Laboratory of Biosensing Technology, School of Life Sciences, Shanghai University, Shanghai 200444, PR China.

<sup>b</sup>Shanghai Key Laboratory of Bio-Energy Crops, Shanghai University, Shanghai 200444, China.

<sup>c</sup>Department of Obstetrics and Gynecology, The First Affiliated Hospital of Nanjing Medical University, 210036 Nanjing, China.

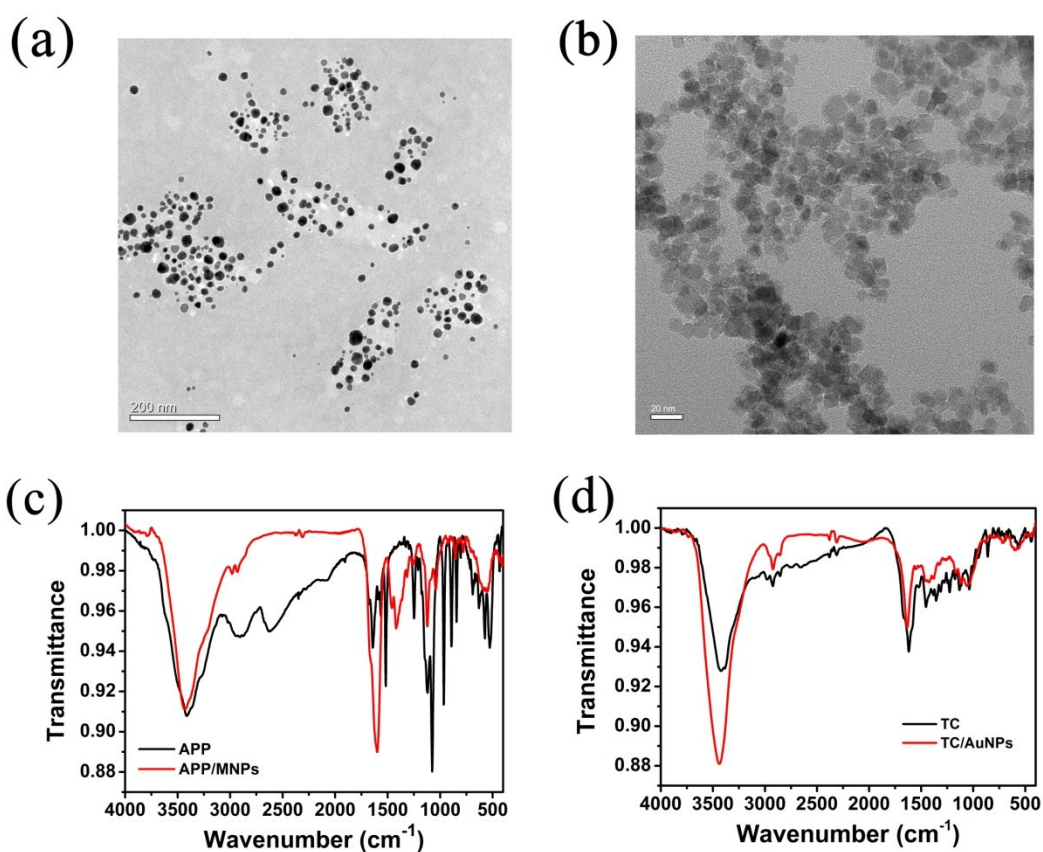

\* Corresponding authors, Fax: +86-21-66137541 (J. Zhang), +86-25-86663616 (L. Sun); E-mail addresses: juanzhang@shu.edu.cn (J. Zhang), lizhou\_sun121@hotmail.com (L. Sun).

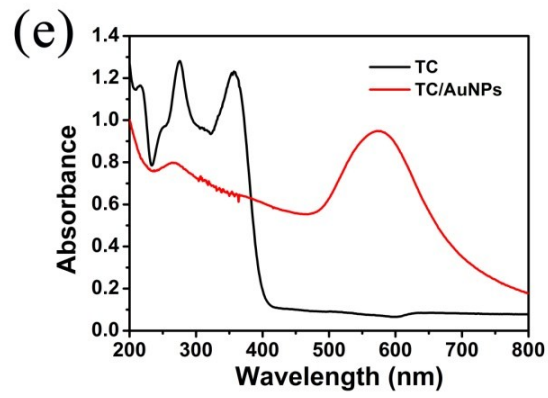

Figure S1 (a) TEM images of TC/AuNPs. (b) TEM images of APP/MNPs. (c) FT-IR spectra of APP and APP/MNPs. (d) FT-IR spectra of TC and TC/AuNPs. (e) UV-vis spectra of TC and TC/AuNPs.
